# Supplementary material for: Analysis of Sequential Pretreatments to Enhance the Early-Stage Biorefinery Designs
Source: MDPI journal article supplement (doi:10.3390/app13116758), 2023-06-01
Supplement: s1 [file s1]

## Supplementary Material

**Table S1.** Equipment mapping of sequential pretreatment schemes.

| Equipment           | Aspen Model | Remarks                                    |
|---------------------|-------------|--------------------------------------------|
| Crusher             | Crusher     | Gyratory crusher                           |
| Sieve               | Sieve       | Rectangle sieve                            |
| Mixer               | Mixer       | Enclosed vertical tank                     |
| Reactor             | RStoic      | Agited tank – enclosed, jacketed           |
| Heat exchanger      | Heater      | TEMA tube and shell exchanger              |
| Filter              | Filter      | Rotary drum filter                         |
| Distillation Column | RadFrac     | Multiple diameter, trayed or packed column |
| Pump                | Pump        | Centrifugal single or multi-stage pump     |
| Compressor          | Compr       | Centrifugal air compressor with motor      |
