# Supplementary material for: Analysis of Sequential Pretreatments to Enhance the Early-Stage Biorefinery Designs
Source: MDPI journal article supplement (doi:10.3390/app13116758), 2023-06-01
Supplement: s1 [file s1]

Archive with 1 entries (1 files):
- applsci-2384889-supplementary.pdf
